# Supplementary material
Source: PubMed Central journal article supplement (PMC7610447)

# Source Data Extended Data Fig. 1

## a. uncropped blots for Extended Data Fig. 1b

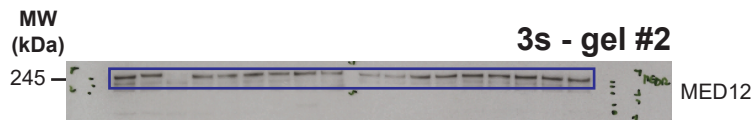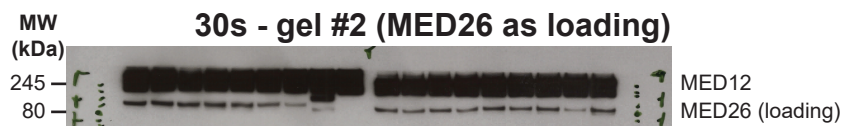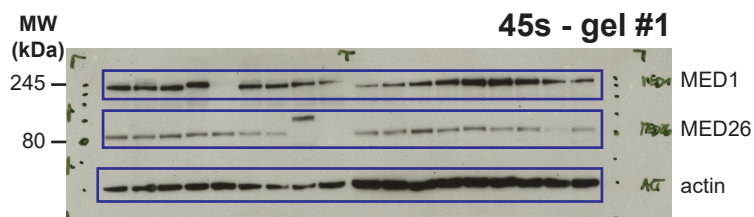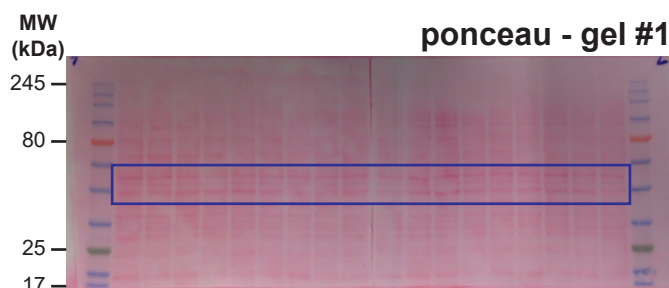

**molecular weight standard:**  
NEB Color Protein Standard broad range (NEB #P7712)

-) Manual marks indicate cut gel pieces incubated with the respective antibody.

-) Note that for Extended Data Fig. 1b we developed two 10-well gels/membranes on the same film (see ponceau).

-) Blue boxes indicate parts of the blot displayed in the figure.

## c. uncropped blots for Extended Data Fig. 1g

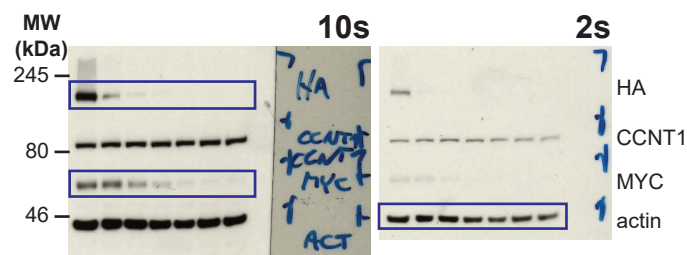

## b. uncropped blots for Extended Data Fig. 1c

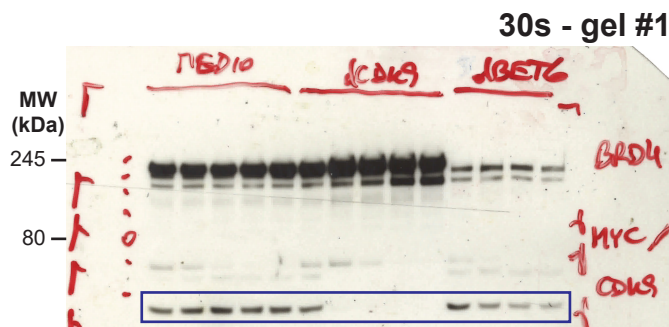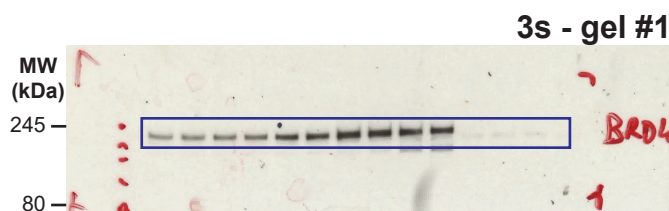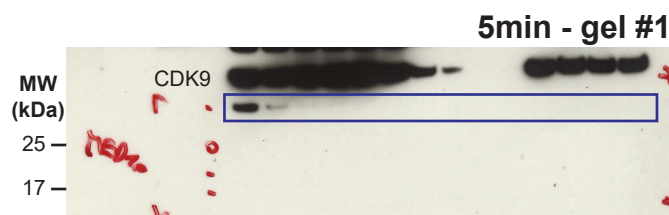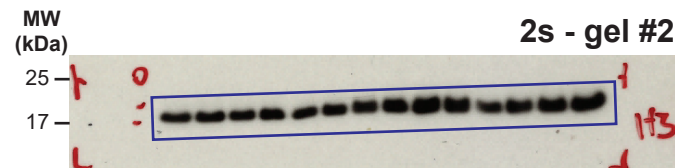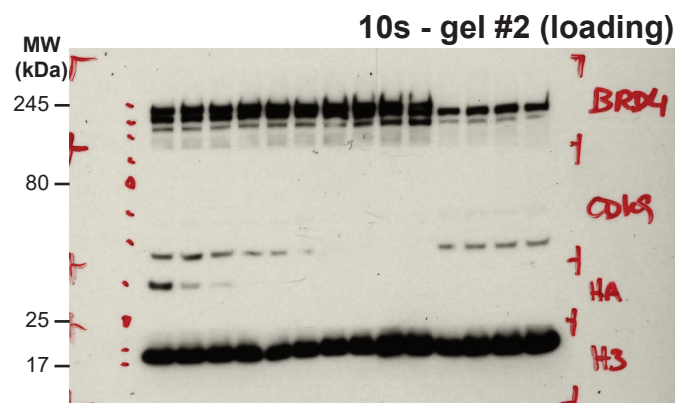

Supplement: EMS118440-supplement-Source_Data_Extended_Data_Fig__1.pdf [file EMS118440-supplement-Source_Data_Extended_Data_Fig__1.pdf]
