# Supplementary material
Source: PubMed Central journal article supplement (PMC7610447)

## Source Data Extended Data Fig. 2

### a. uncropped blots for Extended Data Fig. 2b

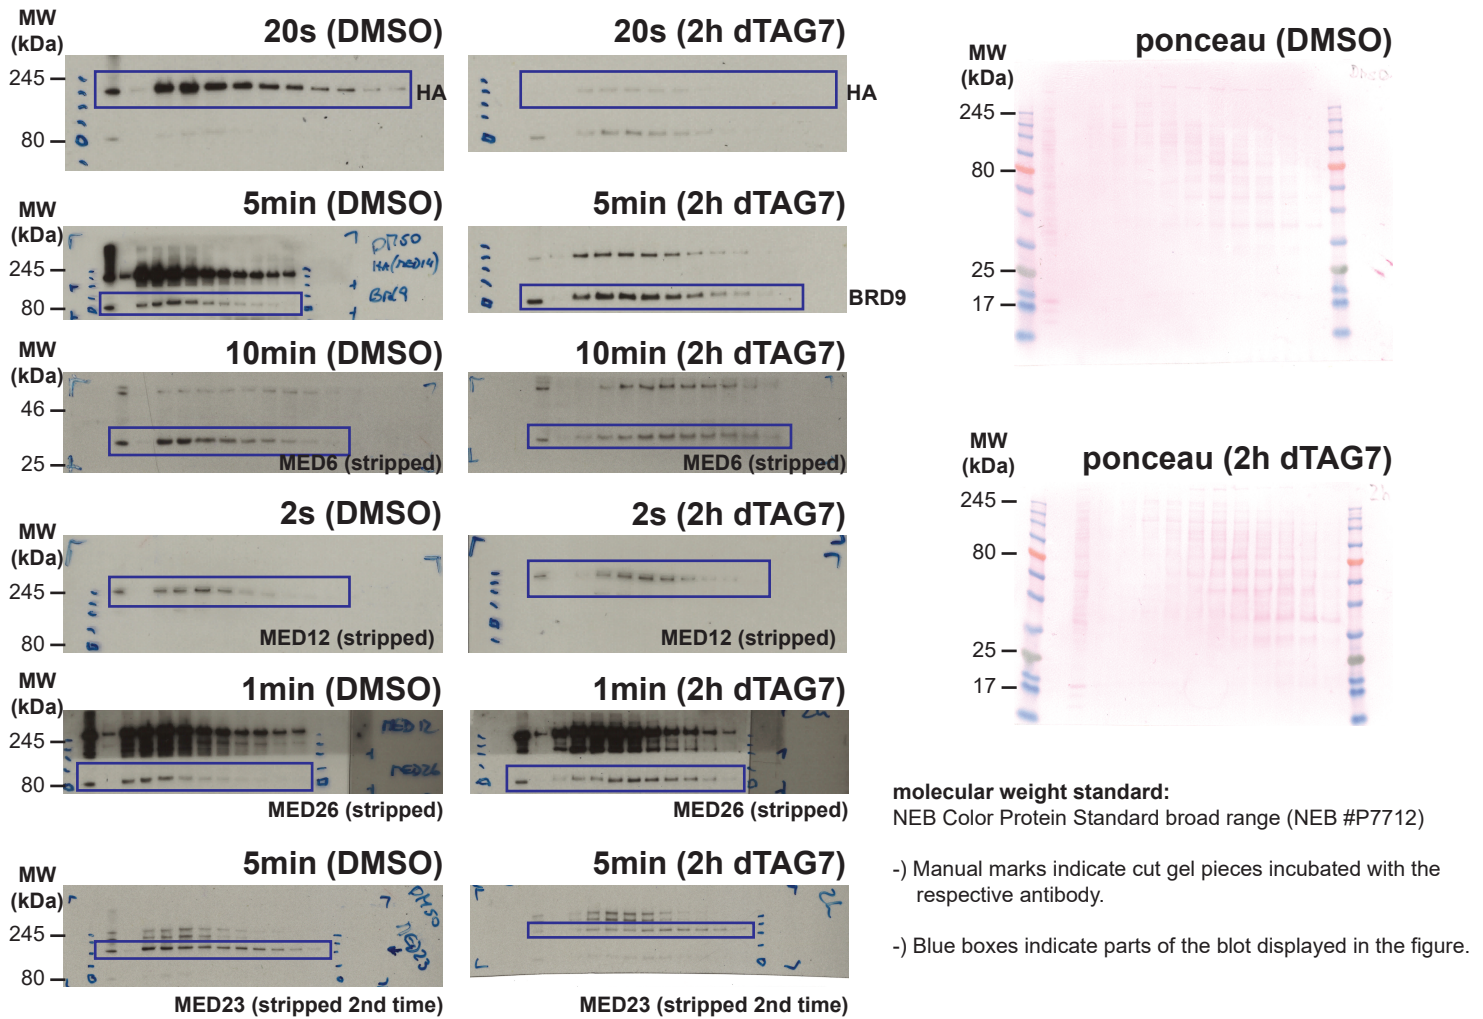

**b.** uncropped blots for Extended Data Fig. 2e

**top (MED14-dTAG)**

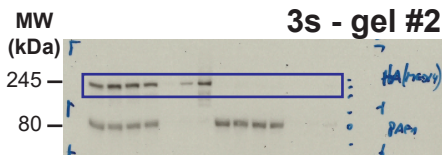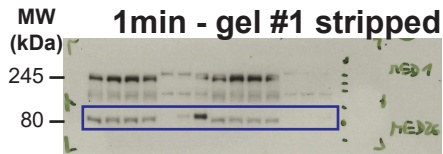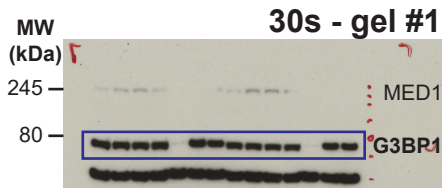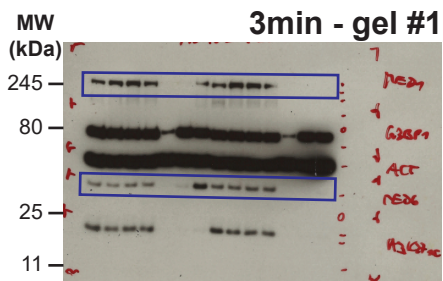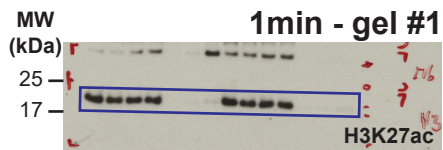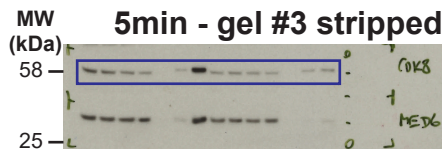

**bottom (MED1-dTAG)**

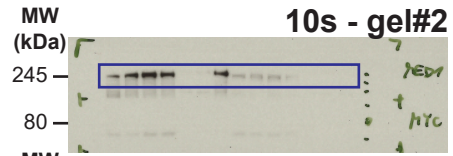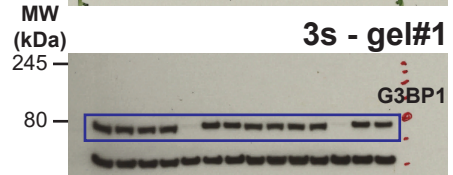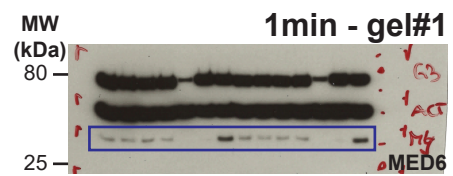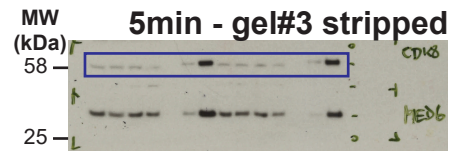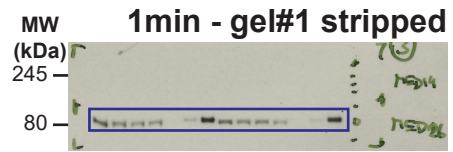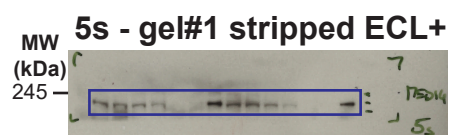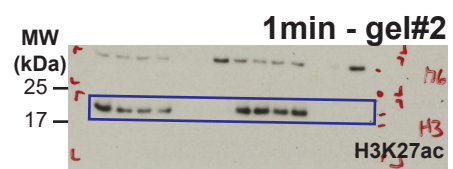

Supplement: EMS118440-supplement-Source_Data_Extended_Data_Fig__2.pdf [file EMS118440-supplement-Source_Data_Extended_Data_Fig__2.pdf]
