# Supplementary material
Source: PubMed Central journal article supplement (PMC7610447)
Supplement: EMS118440-supplement-Source_Data_Extended_Data_Fig__3.pdf [file EMS118440-supplement-Source_Data_Extended_Data_Fig__3.pdf]

## Source Data Extended Data Fig. 3

a. uncropped blots for Extended Data Fig. 3b

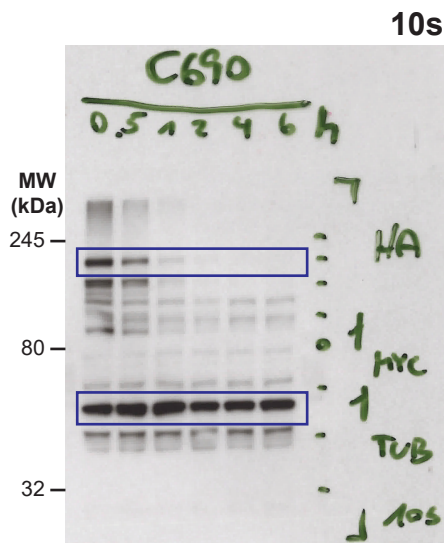

**molecular weight standard:**

NEB Color Protein Standard broad range (NEB #P7712)

-) Manual marks indicate cut gel pieces incubated with the respective antibody.

-) Blue boxes indicate parts of the blot displayed in the figure.
