# Supplementary material
Source: PubMed Central journal article supplement (PMC7610447)
Supplement: EMS118440-supplement-Source_Data_Fig__1.pdf [file EMS118440-supplement-Source_Data_Fig__1.pdf]

## Source Data Fig. 1

a. uncropped blot for Fig. 1b

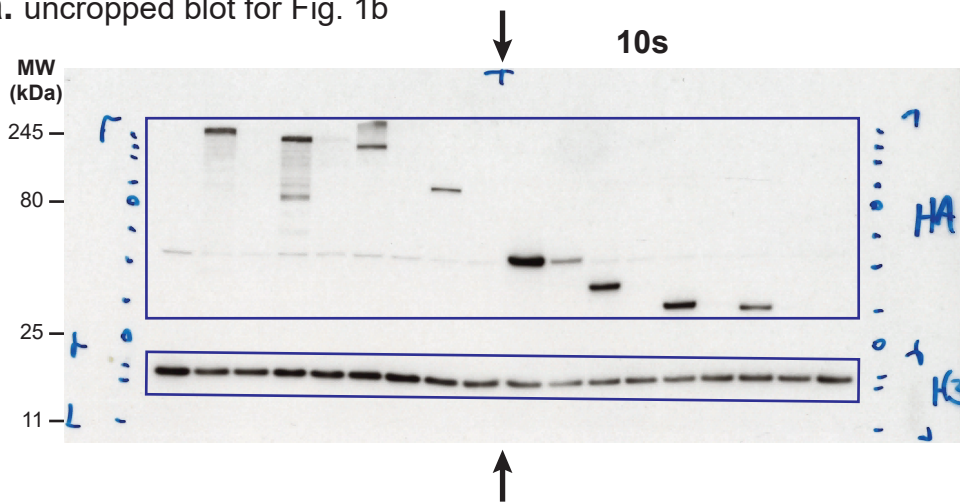

**molecular weight standard:**

NEB Color Protein Standard broad range (NEB #P7712)

- ) Manual marks indicate cut gel pieces incubated with the respective antibody.
- ) Note that here we developed two gels/membranes on the same film, as indicated by the horizontal cut mark and arrows.
- ) Blue boxes indicate parts of the blot displayed in the figure.
