# Supplementary material
Source: PubMed Central journal article supplement (PMC7610447)

# Source Data Fig. 4

## a. uncropped blots for Fig. 4b

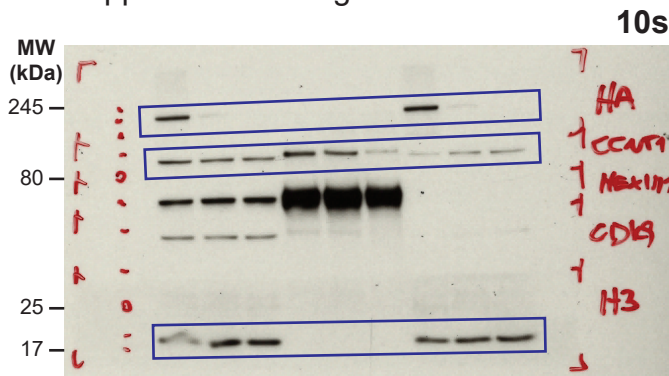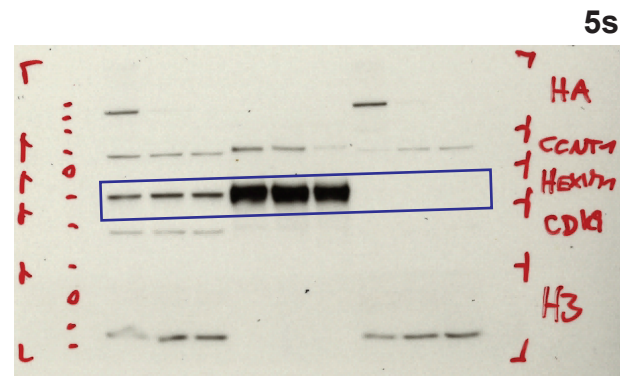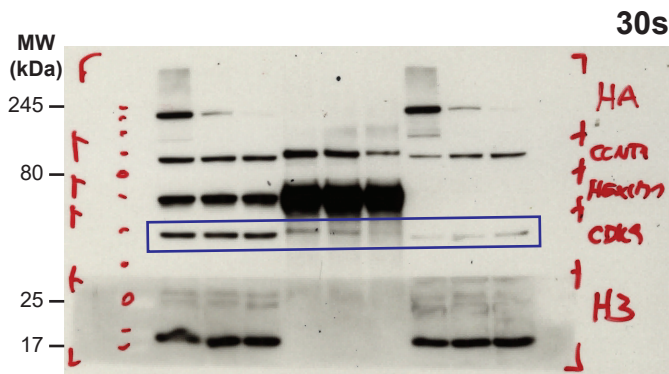

molecular weight standard:  
NEB Color Protein Standard broad range (NEB #P7712)

- ) Manual marks indicate cut gel pieces incubated with the respective antibody.
- ) Blue boxes indicate parts of the blot displayed in the figure.

## b. uncropped blots for Fig. 4c

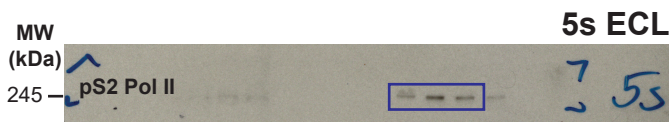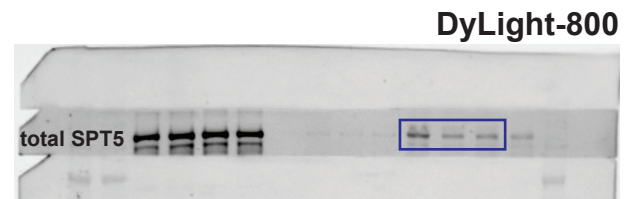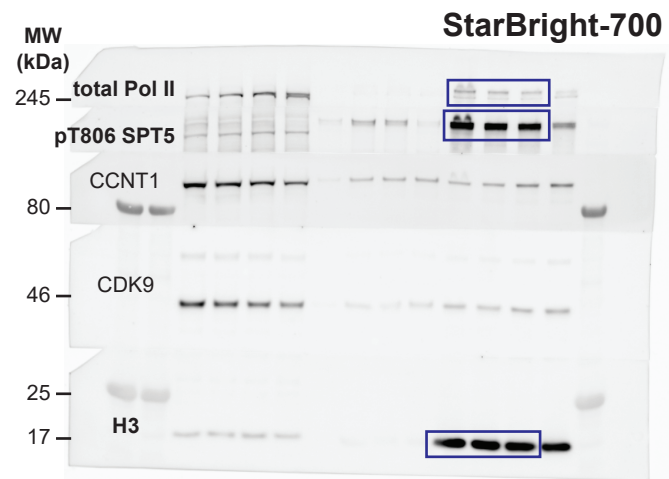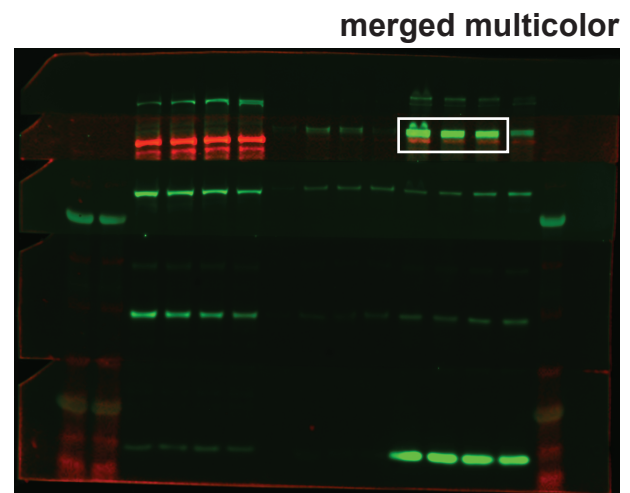

Supplement: EMS118440-supplement-Source_Data_Fig__4.pdf [file EMS118440-supplement-Source_Data_Fig__4.pdf]
